## Sequence analysis

# Updating the 97% identity threshold for 16S ribosomal RNA OTUs

Robert C. Edgar

Sonoma, CA, USA

Associate Editor: Alfonso Valencia

Received on September 18, 2017; revised on February 5, 2018; editorial decision on February 22, 2018; accepted on February 27, 2018

### Abstract

**Motivation:** The 16S ribosomal RNA (rRNA) gene is widely used to survey microbial communities. Sequences are often clustered into Operational Taxonomic Units (OTUs) as proxies for species. The canonical clustering threshold is 97% identity, which was proposed in 1994 when few 16S rRNA sequences were available, motivating a reassessment on current data.

**Results:** Using a large set of high-quality 16S rRNA sequences from finished genomes, I assessed the correspondence of OTUs to species for five representative clustering algorithms using four accuracy metrics. All algorithms had comparable accuracy when tuned to a given metric. Optimal identity thresholds were ~99% for full-length sequences and ~100% for the V4 hypervariable region.

**Availability and implementation:** Reference sequences and source code are provided in the [Supplementary Material](#).

**Contact:** robert@drive5.com

**Supplementary information:** [Supplementary data](#) are available at *Bioinformatics* online.

## 1 Introduction

Next-generation sequencing of the 16S ribosomal RNA (rRNA) gene has revolutionized the study of microbial communities in environments ranging from the human body (Cho and Blaser, 2012; Pflughoeft and Versalovic, 2012) to oceans (Moran, 2015) and soils (Hartmann *et al.*, 2014). Data analysis in such studies typically assigns 16S rRNA sequences to Operational Taxonomic Units (OTUs). Many OTU clustering methods have been proposed [for example (Edgar, 2013; Rideout *et al.*, 2014; Schloss and Handelsman, 2005; Schloss *et al.*, 2009; Seguritan and Rohwer, 2001; Ye, 2011)], most of which use a threshold of 97% sequence identity. Typically, this threshold is considered given rather than as a tunable parameter, following the conventional wisdom that 97% corresponds approximately to species (Schloss and Handelsman, 2005; Seguritan and Rohwer, 2001; Westcott and Schloss, 2017). The 97% threshold was proposed in 1994 (Stackebrandt and Goebel, 1994) when few 16S rRNA sequences were available, raising the question of whether this value is supported by the much larger datasets currently available. In this work, I used a high-quality set of 16S rRNA sequences from known species to investigate whether the 97% threshold is a good approximation to species, whether a better threshold

can be identified, and whether clustering algorithms can be ranked by quality.

OTU clustering is most commonly used in analysis of next-generation amplicon reads of the 16S rRNA gene. These reads have errors due to PCR and sequencing which can cause large numbers of spurious OTUs (e.g. Edgar and Flyvbjerg, 2014; Huse *et al.*, 2010). Thus, in practice, low OTU quality may be due to inadequate error filtering rather than the clustering algorithm. Here, I focus on OTUs of correct sequences to investigate whether algorithms differ in their ability to reproduce species classifications by taxonomists. While it could be of interest to investigate the tolerance of clustering algorithms to errors, this is a complex issue beyond the scope of the work reported here. Also, state-of-the-art denoisers have been shown to accurately recover biological sequences from 454 and Illumina amplicon reads (Callahan *et al.*, 2016; Edgar, 2017b; Quince *et al.*, 2009) suggesting that the best strategy for amplicon reads is to cluster denoised sequences, in which case the clustering problem is well-modeled by error-free sequences from known species.

Several OTU quality metrics have been proposed, including richness (e.g. Sun *et al.*, 2009), normalized mutual information (Cai and Sun, 2011; Zheng *et al.*, 2012) and Matthews' Correlation

Coefficient (Schloss and Westcott, 2011). I investigated whether different quality metrics give consistent algorithm rankings, which would support published claims that some algorithms generate objectively superior OTUs (e.g. Cai and Sun, 2011; Schloss, 2008; Schloss and Westcott, 2011; Westcott and Schloss, 2017).

## 2 Materials and methods

### 2.1 HiQFL and HiQV4 databases

To assess cluster quality, I required a set of correct 16S rRNA sequences with authoritative taxonomy annotations. Curated databases of 16S rRNA sequences include SILVA (Pruesse *et al.*, 2007), RDP (Maidak *et al.*, 2001) and Greengenes (DeSantis *et al.*, 2006b). Most of the sequences in these databases were obtained by PCR amplification of environmental samples and have predicted rather than authoritative taxonomies (McDonald *et al.*, 2012; Wang *et al.*, 2007; Yilmaz *et al.*, 2014). Many belong to unnamed species (Yarza *et al.*, 2014), and annotations of named species may be false positive predictions. These databases are therefore not suitable.

I constructed a new database (HiQFL) of high-quality, full-length 16S rRNA sequences from authoritatively named isolate strains as follows. I downloaded all prokaryotic genome assemblies from GenBank (Benson *et al.*, 2012) that were annotated as ‘Complete’ in the *assembly\_summary\_genbank.txt* file on Feb 15th, 2017. 16S rRNA gene sequences were identified using SEARCH\_16S (Edgar, 2017a,b). If any wildcard letters or ambiguity codes were found in a 16S rRNA sequence, all sequences from its assembly were discarded to avoid ambiguous sequence identities and ensure that intra-genome variation between 16S rRNA paralogs was accurately represented. One copy of each identical sequence from each assembly was retained. HiQFL contains 16741 sequences from 6240 assemblies of 2512 species. Some species have many assemblies, with most for *Escherichia coli* (1115 assemblies) and *Salmonella enterica* (1035), while 1106 species have exactly one assembly. To create a dataset with less taxonomic bias, I created the HiQFL\_1 database by selecting one assembly at random for each species. The V4 hyper-variable region is currently a popular target for next-generation sequencing. To test clustering on high-quality V4 data, I constructed the HiQV4 and HiQV4\_1 databases by extracting the segment between the primers V4F = GTGCCAGC MGCCGCGGTAA and V4R = GGACTACHVGGGTWTCTAAT (Kozich *et al.*, 2013) from HiQFL and HiQFL\_1 respectively.

### 2.2 OTU quality metrics

I used four quality metrics  $RR$ ,  $NMI$ ,  $MCC_{sp}$  and  $Bij$ . Richness ratio ( $RR$ ) is  $\min(S, N)/\max(S, N)$  where  $S$  is the number of species and  $N$  is the number of OTUs. Normalized mutual information ( $NMI$ ) (Cover and Thomas, 1991) is an information theory measure of the mutual dependence between two frequency distributions. Matthews’ Correlation Coefficient ( $MCC$ ) (Baldi *et al.*, 2000; Matthews, 1975) measures the accuracy of a binary classifier as a correlation between predicted and known values. I defined the correlation between OTUs and species ( $MCC_{sp}$ ), by considering a pair of sequences to be correctly classified if they belong to the same species and are in the same OTU. This differs from the metric ( $MCC_{sw}$ ) of (Schloss and Westcott, 2011) where a pair is considered to be correctly classified if they have  $\geq 97\%$  identity and are in the same OTU (see Discussion). I defined bijection ( $Bij$ ) as the fraction of species that have 1:1 correspondence with an OTU. All four metrics have a maximum value of one indicating the best possible quality. For further details and discussion, see the Supplementary Material.

### 2.3 Clustering algorithms

I tested the following clustering algorithms: nearest-neighbor (NN, also called single-linkage), average-neighbor (AN, also known as UPGMA or average-linkage), furthest-neighbor (FN, also called complete-linkage), OptiClust (OC) (Westcott and Schloss, 2017) and abundance-sorted greedy clustering (AGC) (Ye, 2011). For NN, AN, FN and OC I used mothur v1.39.5 (Schloss *et al.*, 2009) (commands given in Supplementary Material Files). I implemented AGC in a Python script that accepts a mothur distance matrix as input to ensure that the same identities were used by all algorithms.

### 2.4 Optimal thresholds

I ran each clustering algorithm on the four HiQ databases with thresholds ranging from 96 to 100% in steps of 0.1%. For each database, clustering algorithm and quality metric, I identified the optimal threshold as the tested threshold which gave the largest value of the metric.

### 2.5 Conspecific probability

It is well-known that some pairs of species have 16S rRNA sequences with  $>97\%$  identity and using a fixed threshold cannot reliably identify species (e.g. Schloss, 2010). This correspondence between identity and species can be investigated independently of clustering by measuring the probability that two sequences are conspecific (i.e. belong to the same species) as a function of identity. Let the *conspecific probability*  $P_{cs}(D | d(X, Y))$  be the probability that two sequences  $X, Y$  selected at random from a distribution  $\mathcal{D}$  belong to the same species given a measure  $d$  of pair-wise distance between  $X$  and  $Y$ . I calculated  $P_{cs}$  for each HiQ database by assuming that sequences are drawn at random from the database with equal probabilities. Pair-wise identities calculated by mothur were binned into intervals of 0.5%. For each bin (e.g.  $97.0\% \leq d < 97.5\%$ ), let  $M_d$  be the total number of pairs and  $m_d$  be the number of pairs which belong to the same species, then  $P_{cs}(d) = m_d/M_d$ .

### 2.6 Assessment of pair-wise alignments

Mothur distances are calculated from a multiple alignment constructed using an algorithm based on the NAST strategy (DeSantis *et al.*, 2006a) which introduces misalignments to preserve a fixed number of columns. I compared alignments by mothur and CLUSTALW v2.1 (Thompson *et al.*, 2002) on 16S rRNA sequences from (Kozich *et al.*, 2013). I took the 100 most abundant unique sequences in the reads assigned to soil samples (*soil100*) and constructed alignments for all pairs. For each pair-wise alignment, I calculated identity as the number of columns containing identical letters divided by the number of columns containing at least one letter.

### 2.7 Adverse triplets

It has been proposed (Schloss and Westcott, 2011; Westcott and Schloss, 2017) that OTUs should be constructed such that all pairs of sequences with identity  $\geq 97\%$  are assigned to the same OTU and all pairs  $< 97\%$  are assigned to different OTUs. This constraint cannot be satisfied if there is an *adverse triplet*  $\{A, B, C\}$  with pair-wise distances  $A-B \geq 97\%$ ,  $B-C \geq 97\%$  and  $A-C < 97\%$  because  $A-B$  and  $B-C$  imply that  $A, B$  and  $C$  should be assigned to the same OTU while  $A-C$  implies that  $A$  and  $C$  should be assigned to different OTUs. If a solution exists, an adverse triplet cannot be present because all pair-wise constraints are satisfied. Therefore, a solution exists if, and only if, there are no adverse triplets in the data. To investigate whether this is an issue in practice, I identified adverse

**Table 1.** Optimal thresholds and metric values

| Data    | Metric            | Maximum metric |      |      |      |      | Optimal identity threshold |       |       |       |       |
|---------|-------------------|----------------|------|------|------|------|----------------------------|-------|-------|-------|-------|
|         |                   | NN             | AN   | OC   | FN   | AGC  | NN                         | AN    | OC    | FN    | AGC   |
| HiQFL   | RR                | 0.99           | 0.99 | 0.99 | 1.00 | 0.98 | 99.3                       | 99.1  | 99.0  | 98.8  | 99.1  |
|         | MCC <sub>sp</sub> | 0.86           | 0.86 | 0.85 | 0.85 | 0.85 | 99.3                       | 98.5  | 98.4  | 97.8  | 98.0  |
|         | Bij               | 0.62           | 0.63 | 0.62 | 0.62 | 0.63 | 99.4                       | 99.4  | 99.4  | 99.3  | 99.4  |
|         | NMI               | 0.95           | 0.95 | 0.95 | 0.95 | 0.94 | 99.3                       | 98.8  | 98.9  | 97.8  | 98.0  |
| HiQFL_1 | RR                | 1.00           | 0.98 | 0.98 | 0.99 | 0.99 | 99.5                       | 99.4  | 99.4  | 99.2  | 99.3  |
|         | MCC <sub>sp</sub> | 0.55           | 0.61 | 0.61 | 0.64 | 0.59 | 99.6                       | 99.4  | 99.4  | 99.0  | 99.3  |
|         | Bij               | 0.68           | 0.68 | 0.67 | 0.67 | 0.67 | 99.5                       | 99.4  | 99.4  | 99.4  | 99.4  |
|         | NMI               | 0.96           | 0.97 | 0.97 | 0.97 | 0.97 | 99.5                       | 99.2  | 99.4  | 99.1  | 99.3  |
| HiQV4   | RR                | 0.85           | 0.97 | 0.92 | 0.98 | 0.94 | 100.0                      | 99.6  | 99.6  | 99.6  | 99.6  |
|         | MCC <sub>sp</sub> | 0.78           | 0.79 | 0.79 | 0.79 | 0.78 | 100.0                      | 99.6  | 99.6  | 98.8  | 99.3  |
|         | Bij               | 0.51           | 0.51 | 0.51 | 0.51 | 0.52 | 100.0                      | 100.0 | 100.0 | 100.0 | 100.0 |
|         | NMI               | 0.93           | 0.93 | 0.93 | 0.93 | 0.93 | 100.0                      | 99.6  | 99.6  | 99.2  | 100.0 |
| HiQV4_1 | RR                | 0.93           | 0.93 | 0.93 | 0.93 | 0.93 | 100.0                      | 100.0 | 100.0 | 100.0 | 100.0 |
|         | MCC <sub>sp</sub> | 0.48           | 0.50 | 0.50 | 0.49 | 0.48 | 100.0                      | 99.6  | 99.3  | 99.6  | 100.0 |
|         | Bij               | 0.56           | 0.56 | 0.56 | 0.56 | 0.56 | 100.0                      | 100.0 | 100.0 | 100.0 | 100.0 |
|         | NMI               | 0.95           | 0.95 | 0.95 | 0.95 | 0.95 | 100.0                      | 100.0 | 100.0 | 100.0 | 100.0 |

Note: Metric values for all thresholds are provided in the [Supplementary Material](#).

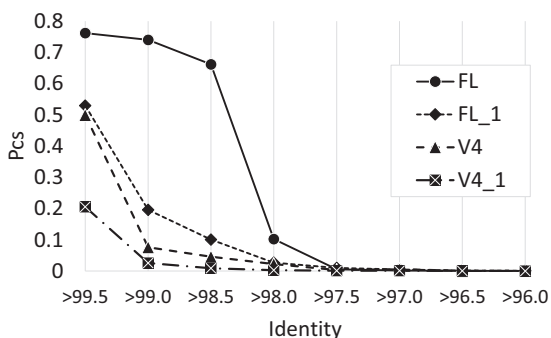

**Fig. 1.** Conspecific probabilities  $P_{sc}(d)$  for the HiQ databases. FL is HiQFL, FL\_1 is HiQFL\_1, V4 is HiQV4, V4\_1 is HiQV4\_1. Identities are binned into intervals of 0.5% so e.g. the x-axis label >97% means  $97.5\% \geq d > 97\%$

triplets of species in the HiQ16\_1, HiQV4\_1 and soil100 datasets using the mothur distance matrices.

### 3 Results

#### 3.1 Optimal thresholds

Optimal thresholds are given in [Table 1](#); metric values for all thresholds are given in the [Supplementary Material Files](#). All algorithms achieve comparable maximum scores with all metrics. No algorithm is consistently better than any other, showing that algorithms cannot be meaningfully ranked by OTU quality. Optimal thresholds are all higher than 97%, especially on V4 where the optimal threshold is 100% for 9/20 of algorithm-metric combinations on HiQV4 and 17/20 on HiQV4\_1.

#### 3.2 Conspecific probabilities

See [Figure 1](#); numerical values are given in [Supplementary Table S1](#). Conspecific probabilities for the four databases are quite different, illustrating that the probability depends on the gene segment (full-length or V4) and on the distribution from which sequences are sampled; i.e. on the composition and abundance distribution of species in the data.

#### 3.3 Adverse triplets

See [Supplementary Material Files](#) for complete lists of adverse triplets. I found 25 402 triplets in HiQFL\_1 with 776/2512 of species

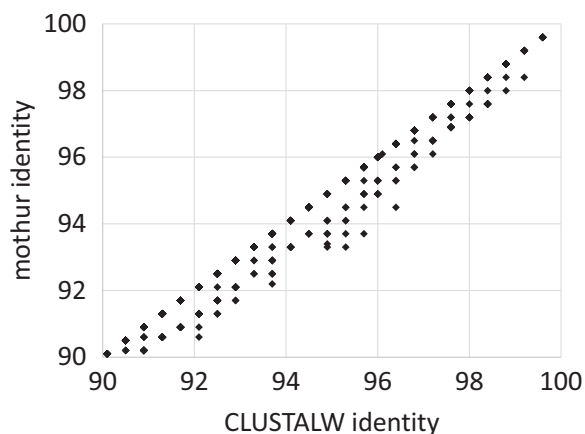

**Fig. 2.** Scatterplot of CLUSTALW versus mothur identity. More than half of the points are below the diagonal and none are above, reflecting that mothur systematically underestimates pair-wise identity due to alignment errors (see [Fig. 3](#) for an example)

(31%) appearing in at least one triplet. In HiQV4\_1, I found 106 576 triplets containing 1320/2512 (53%) distinct species, and in soil100 I found 384 triplets containing 25/100 (25%) of the input sequences. This shows that adverse triplets are ubiquitous in the tested datasets and are therefore probably common in practice.

#### 3.4 Mothur alignment errors

A scatterplot of CLUSTALW versus mothur identities is given in [Figure 2](#). This shows that mothur systematically underestimates identity of closely-related pairs (>90% identity) compared with CLUSTALW, which constructs alignments by pair-wise dynamic programming ([Needleman and Wunsch, 1970](#)). A manual review revealed that all cases where mothur reported lower identities were due to alignment errors (see [Fig. 3](#) and [Supplementary Fig. S1](#) for an example; all alignments are given in the [Supplementary Material Files](#)). Errors of these types do not occur with pair-wise dynamic programming, which implies that the optimal thresholds reported here may be underestimates for similar clustering methods implemented in other software packages.

(a) mothur alignment

```

A GAACACC-GGTGGCGAAG
  ||||| | |||||
B GAACACCGG-TGGCGAAG

```

(b) CLUSTALW alignment

```

A GAACACCGGTGGCGAAG
  ||||| |||||
B GAACACCGGTGGCGAAG

```

**Fig. 3.** Typical misalignment by mothur. Segment of the alignments by mothur (above) and CLUSTALW (below) for soil.1137 (a) and soil.191 (b); sequences are given in the [Supplementary Material](#). See [Supplementary Figure S1](#) for complete alignments. Misalignments of this type do not occur with pair-wise dynamic programming

## 4 Discussion

### 4.1 Comments on the $MCC_{SW}$ metric

Recent papers (Schloss and Westcott, 2011; Westcott and Schloss, 2015, 2017) have proposed a variant of Matthews' Correlation Coefficient (here called  $MCC_{SW}$ ) as a definitive accuracy metric for OTUs containing noisy or error-free sequences. Typically, the accuracy of a clustering algorithm is assessed for individual objects (here, sequences) by comparison to categories which have been independently determined (e.g. species). By contrast,  $MCC_{SW}$  measures accuracy by assuming that true OTUs objectively exist and can be defined indirectly via a binary classification of pairs of sequences from the sequences alone, without considering their biological origin. The standard of truth is based on pair-wise identity as measured by mothur: if a pair is  $\geq 97\%$ , the sequences are asserted to be in the same true OTU; otherwise they are in different true OTUs. However, OTUs by this definition generally do not exist because of adverse triplets. Also, true positives and true negatives by this standard may in fact be biological errors. For example, consider a pair of reads of a chimeric amplicon formed during PCR. They cannot be assigned to a valid biological OTU if they have  $< 97\%$  identity to their parent sequences, but are a true positive if they have  $> 97\%$  identity to each other. Conversely, a pair of paralogs from a single genome should be assigned to the same biological OTU, but are asserted to be a true negative if they have  $< 97\%$  identity. The use of mothur distances as a standard is invalid if misalignments are common, and regardless biases the metric against methods that use different parameters (e.g. gap penalties) or distance measures. The [Supplementary Material](#) gives examples where  $MCC_{SW}$  is undefined due to division by zero and does not give the highest score to the best clusters. Finally, the results presented here show that threshold of 97% is far from optimal as an approximation to species.  $MCC_{SW}$  is therefore not viable as a benchmark standard of biological accuracy.

### 4.2 There is no best algorithm, threshold or accuracy metric

In the tests reported here, all algorithms achieved comparably high scores by a given quality metric when thresholds were tuned to the

input data and metric, showing that no algorithm is intrinsically superior. All metrics were designed to quantify the correspondence between OTUs and species. However, for a given algorithm and dataset different metrics were maximized at different thresholds and thus by different sets of clusters, showing that a single metric cannot definitively quantify accuracy.

### 4.3 Optimal thresholds are data-dependent

Different thresholds were obtained were obtained on HiQFL compared to HiQFL\_1 and on HiQV4 compared to HiQV4\_1. These datasets contain the same species with different abundances, and in general it should be expected that the optimal threshold for a given algorithm and quality metric will depend on the segment (full-length, V4 or some other region), composition and abundance distribution of the data. Since the composition and abundance distributions of communities encountered in practice are highly variable, optimizing a threshold on a given training set cannot reliably predict that it will have high accuracy on novel data.

### 4.4 The canonical 97% threshold is too low

All thresholds in [Table 1](#) are higher than 97%, especially on the V4 region where all optimal thresholds were  $> 99\%$  with a median of 100%. On full-length sequences, most optimal thresholds (11/20 on HiQFL and 19/20 on HiQFL\_1) were  $> 99\%$ . Thus, while keeping the caveats of Section 4.3 in mind, it is clear that if the goal of OTUs is to approximate species, then the canonical 97% threshold is far from optimal for all clustering algorithms and should be increased to at least 99%.

### 4.5 Intra-species variation

There can be 'enormous' strain-to-strain variation in gene content within a species (Doolittle and Papke, 2006), causing substantial differences in phenotype. For example, some strains may be pathogenic while others are symbiotic (Ochman, 2001). As a result, OTUs that accurately approximate species will tend to lump distinct phenotypes into a single cluster, and it could therefore be more biologically informative to construct OTUs approximating strains rather than species, raising the question of whether this is achievable in practice. Resolving strains would require a higher identity threshold than species. With the V4 region, optimal thresholds for species are at or very close to 100%, showing that higher resolution is probably not possible in general, though some strains might be resolved for some species. Full-length sequences might enable better strain resolution, as might segments of intermediate length containing two or more hypervariable regions. However, definition and assessment of strain-based OTUs raises new difficulties compared to species. For example, some strains have very similar phenotypes which could reasonably be assigned to the same OTU, while others are substantially different and would preferably be assigned to different OTUs, raising the question of whether such distinctions could be satisfactorily quantified and annotated for parameter training and benchmark testing. Also, while complete genome assemblies are available for multiple strains of many species, yielding a robust set of examples for determining typical levels of intra-species sequence variation, type strains are usually genetically identical rather than naturally occurring subspecies (Dijkshoorn *et al.*, 2000) and little information is therefore available about subspecies sequence variation *in vivo*.

### 4.6 ZOTUs

If a 100% identity threshold is used, then each distinct sequence defines a separate OTU. I have previously called this a ZOTU (zero-radius OTU) (Edgar, 2017b); it has also been called a Sequence

Variant (Callahan *et al.*, 2016). I agree with a recent perspective (Callahan *et al.*, 2017) arguing that ‘improvements in reusability, reproducibility and comprehensiveness are sufficiently great that [ZOTUs] should replace [97%] OTUs as the standard unit of marker-gene analysis and reporting’. ZOTUs achieve the best possible phenotype resolution at the expense of an increased tendency to split species and strains over multiple OTUs. However, some lumping and/or splitting of strains and species is unavoidable at any threshold. With V4 sequences, the results presented here show that ZOTUs achieve a reasonable balance between lumping and splitting of species while 97% OTUs have a strong tendency to lump species together. ZOTUs have the additional advantage of being directly comparable between datasets without re-clustering [i.e. ZOTUs are *stable* as defined by Rideout *et al.* (2014)], providing that the same gene segment is compared. With longer sequences, ZOTUs may cause more splitting than lumping, but this is a relatively benign problem which can be addressed by downstream analysis. For example, alpha diversity could be adjusted according to estimated rates of splitting and lumping. ZOTUs of longer sequences may therefore also be preferred over traditional OTUs for their improved ability to discriminate phenotypes.

*Conflict of Interest:* none declared.

## References

- Baldi, P. *et al.* (2000) Assessing the accuracy of prediction algorithms for classification: an overview. *Bioinformatics*, **16**, 412–424.
- Benson, D.A. *et al.* (2012) GenBank. *Nucleic Acids Res.*, **41**, D36.
- Cai, Y. and Sun, Y. (2011) ESPRIT-Tree: hierarchical clustering analysis of millions of 16S rRNA pyrosequences in quasilinear computational time. *Nucleic Acids Res.*, **39**, e95.
- Callahan, B.J. *et al.* (2017) Exact sequence variants should replace operational taxonomic units in marker-gene data analysis. *ISME J.*, doi: 10.1038/ismej.2017.119.
- Callahan, B.J. *et al.* (2016) DADA2: high-resolution sample inference from Illumina amplicon data. *Nat. Methods*, **13**, 581.
- Cho, I. and Blaser, M.J. (2012) The human microbiome: at the interface of health and disease. *Nat. Rev. Genet.*, **13**, 260–270.
- Cover, T. and Thomas, J. (1991) *Elements of Information Theory*. Wiley, Hoboken, New Jersey.
- DeSantis, T.Z. *et al.* (2006a) NAST: a multiple sequence alignment server for comparative analysis of 16S rRNA genes. *Nucleic Acids Res.*, **34**, W394.
- DeSantis, T.Z. *et al.* (2006b) Greengenes, a chimera-checked 16S rRNA gene database and workbench compatible with ARB. *Appl. Environ. Microbiol.*, **72**, 5069–5072.
- Dijkshoorn, L. *et al.* (2000) Strain, clone and species: comments on three basic concepts of bacteriology. *J. Med. Microbiol.*, **49**, 397–401.
- Doolittle, W.F. and Papke, R.T. (2006) Genomics and the bacterial species problem. *Genome Biol.*, **7**, 116.
- Edgar, R.C. (2017a) SEARCH\_16S: a new algorithm for annotating 16S ribosomal RNA genes. doi: 10.1101/124131.
- Edgar, R.C. (2017b) UNOISE2: improved error-correction for Illumina 16S and ITS amplicon sequencing. doi: 10.1101/081257.
- Edgar, R.C. (2013) UPARSE: highly accurate OTU sequences from microbial amplicon reads. *Nat. Methods*, **10**, 996–998.
- Edgar, R.C. and Flyvbjerg, H. (2014) Error filtering, pair assembly and error correction for next-generation sequencing reads. *Bioinformatics*, **31**, 3476–3482.
- Hartmann, M. *et al.* (2014) Resistance and resilience of the forest soil microbiome to logging-associated compaction. *ISME J.*, **8**, 226–244.
- Huse, S.M. *et al.* (2010) Ironing out the wrinkles in the rare biosphere through improved OTU clustering. *Environ. Microbiol.*, **12**, 1889–1898.
- Kozich, J.J. *et al.* (2013) Development of a dual-index sequencing strategy and curation pipeline for analyzing amplicon sequence data on the miseq illumina sequencing platform. *Appl. Environ. Microbiol.*, **79**, 5112–5120.
- Maidak, B.L. *et al.* (2001) The RDP-II (Ribosomal Database Project). *Nucleic Acids Res.*, **29**, 173–174.
- Matthews, B.W. (1975) Comparison of the predicted and observed secondary structure of T4 phage lysozyme. *BBA – Protein Struct.*, **405**, 442–451.
- McDonald, D. *et al.* (2012) An improved Greengenes taxonomy with explicit ranks for ecological and evolutionary analyses of bacteria and archaea. *ISME J.*, **6**, 610–618.
- Moran, M.A. (2015) The global ocean microbiome. *Science*, **350**, aac8455.
- Needleman, S.B. and Wunsch, C.D. (1970) A general method applicable to the search for similarities in the amino acid sequence of two proteins. *J. Mol. Biol.*, **48**, 443–453.
- Ochman, H. (2001) Genes lost and genes found: evolution of bacterial pathogenesis and symbiosis. *Science*, **292**, 1096–1099.
- Pflughoeft, K.J. and Versalovic, J. (2012) Human microbiome in health and disease. *Annu. Rev. Pathol.*, **7**, 99–122.
- Pruesse, E. *et al.* (2007) SILVA: a comprehensive online resource for quality checked and aligned ribosomal RNA sequence data compatible with ARB. *Nucleic Acids Res.*, **35**, 7188–7196.
- Quince, C. *et al.* (2009) Accurate determination of microbial diversity from 454 pyrosequencing data. *Nat. Methods*, **6**, 639–641.
- Rideout, J.R. *et al.* (2014) Subsampled open-reference clustering creates consistent, comprehensive OTU definitions and scales to billions of sequences. *PeerJ*, **2**, e545.
- Schloss, P.D. (2008) Evaluating different approaches that test whether microbial communities have the same structure. *ISME J.*, **2**, 265–275.
- Schloss, P.D. (2010) The effects of alignment quality, distance calculation method, sequence filtering, and region on the analysis of 16S rRNA gene-based studies. *PLoS Comput. Biol.*, **6**, e1000844.
- Schloss, P.D. and Handelsman, J. (2005) Introducing DOTUR, a computer program for defining operational taxonomic units and estimating species richness. *Applied and Environmental Microbiology*, **71**, 1501–1506.
- Schloss, P.D. and Westcott, S.L. (2011) Assessing and improving methods used in operational taxonomic unit-based approaches for 16S rRNA gene sequence analysis. *Appl. Environ. Microbiol.*, **77**, 3219–3226.
- Schloss, P.D. *et al.* (2009) Introducing mothur: open-source, platform-independent, community-supported software for describing and comparing microbial communities. *Appl. Environ. Microbiol.*, **75**, 7537–7541.
- Seguritan, V. and Rohwer, F. (2001) FastGroup: a program to dereplicate libraries of 16S rDNA sequences. *BMC Bioinformatics*, **2**, 9.
- Stackebrandt, E. and Goebel, B.M. (1994) Taxonomic note: a place for DNA–DNA reassociation and 16S rRNA sequence analysis in the present species definition in bacteriology. *Int. J. Syst. Evol. Microbiol.*, **44**, 846–849.
- Sun, Y. *et al.* (2009) ESPRIT: estimating species richness using large collections of 16S rRNA pyrosequences. *Nucleic Acids Res.*, **37**, e76.
- Thompson, J.D. *et al.* (2002) Multiple sequence alignment using ClustalW and ClustalX. *Curr. Protoc. Bioinf.*, Chapter 2: Unit 2.3. doi: 10.1002/0471250953.bi0203s00.
- Wang, Q. *et al.* (2007) Naive Bayesian classifier for rapid assignment of rRNA sequences into the new bacterial taxonomy. *Appl. Environ. Microbiol.*, **73**, 5261–5267.
- Westcott, S.L. and Schloss, P.D. (2015) De novo clustering methods outperform reference-based methods for assigning 16S rRNA gene sequences to operational taxonomic units. *PeerJ*, **3**, e1487.
- Westcott, S.L. and Schloss, P.D. (2017) OptiClust, an improved method for assigning amplicon-based sequence data to operational taxonomic units. *mSphere*, **2**, e00073–e00017.
- Yarza, P. *et al.* (2014) Uniting the classification of cultured and uncultured bacteria and archaea using 16S rRNA gene sequences. *Nat. Rev. Microbiol.*, **12**, 635–645.
- Ye, Y. (2011) Identification and quantification of abundant species from pyrosequences of 16S rRNA by consensus alignment. *Proceedings (IEEE Int. Conf. Bioinf. Biomed.)*, **2010**, 153–157.
- Yilmaz, P. *et al.* (2014) The SILVA and ‘all-species Living Tree Project (LTP)’ taxonomic frameworks. *Nucleic Acids Res.*, **42**, D643. e-pub ahead of print, doi: 10.1093/nar/gkt1209.
- Zheng, Z. *et al.* (2012) DySC: software for greedy clustering of 16S rRNA reads. *Bioinformatics*, **28**, 2182–2183.
